# Supplementary material for: HLA-G+3027 polymorphism is associated with tumor relapse in pediatric Hodgkin's lymphoma
Source: PubMed Central journal article supplement (PMC5739693; doi:10.18632/oncotarget.22515), 2017-11-18
Supplement: oncotarget-08-105957-s001.pdf [file oncotarget-08-105957-s001.pdf]

## **HLA-G+3027 polymorphism is associated with tumor relapse in pediatric Hodgkin's lymphoma**

### **SUPPLEMENTARY MATERIALS**

**Supplementary Table 1: Genotype and allele frequencies of 8 HLA-G 3' UTR polymorphic variants (14 bp Ins/Del, 3003C/T, 3010C/G, 3027A/C, 3035C/T, 3142C/G, 3187A/G, 3196C/G) in 259 controls (blood donors, BD) compared to 113 patients with Hodgkin lymphoma (HL).**

See Supplementary File 1
